# Supplementary material
Source: PubMed Central journal article supplement (PMC4289687)
Supplement: mmc1.pdf [file mmc1.pdf]

The American Journal of Human Genetics

Supplemental Data

**CRB2 Mutations Produce a Phenotype Resembling  
Congenital Nephrosis, Finnish type, with Cerebral  
Ventriculomegaly and Raised Alpha-Fetoprotein**

Anne Slavotinek, Julie Kaylor, Heather Pierce, Michelle Cahr, Stephanie J. DeWard,  
Dina Schneidman-Duhovny, Adnan Alsadah, Fadi Salem, Gabriela Schmajuk, and  
Lakshmi Mehta

**Figure S1. Pedigree and Chromatograms for Families 1-3 with Mutations in *CRB2*.**

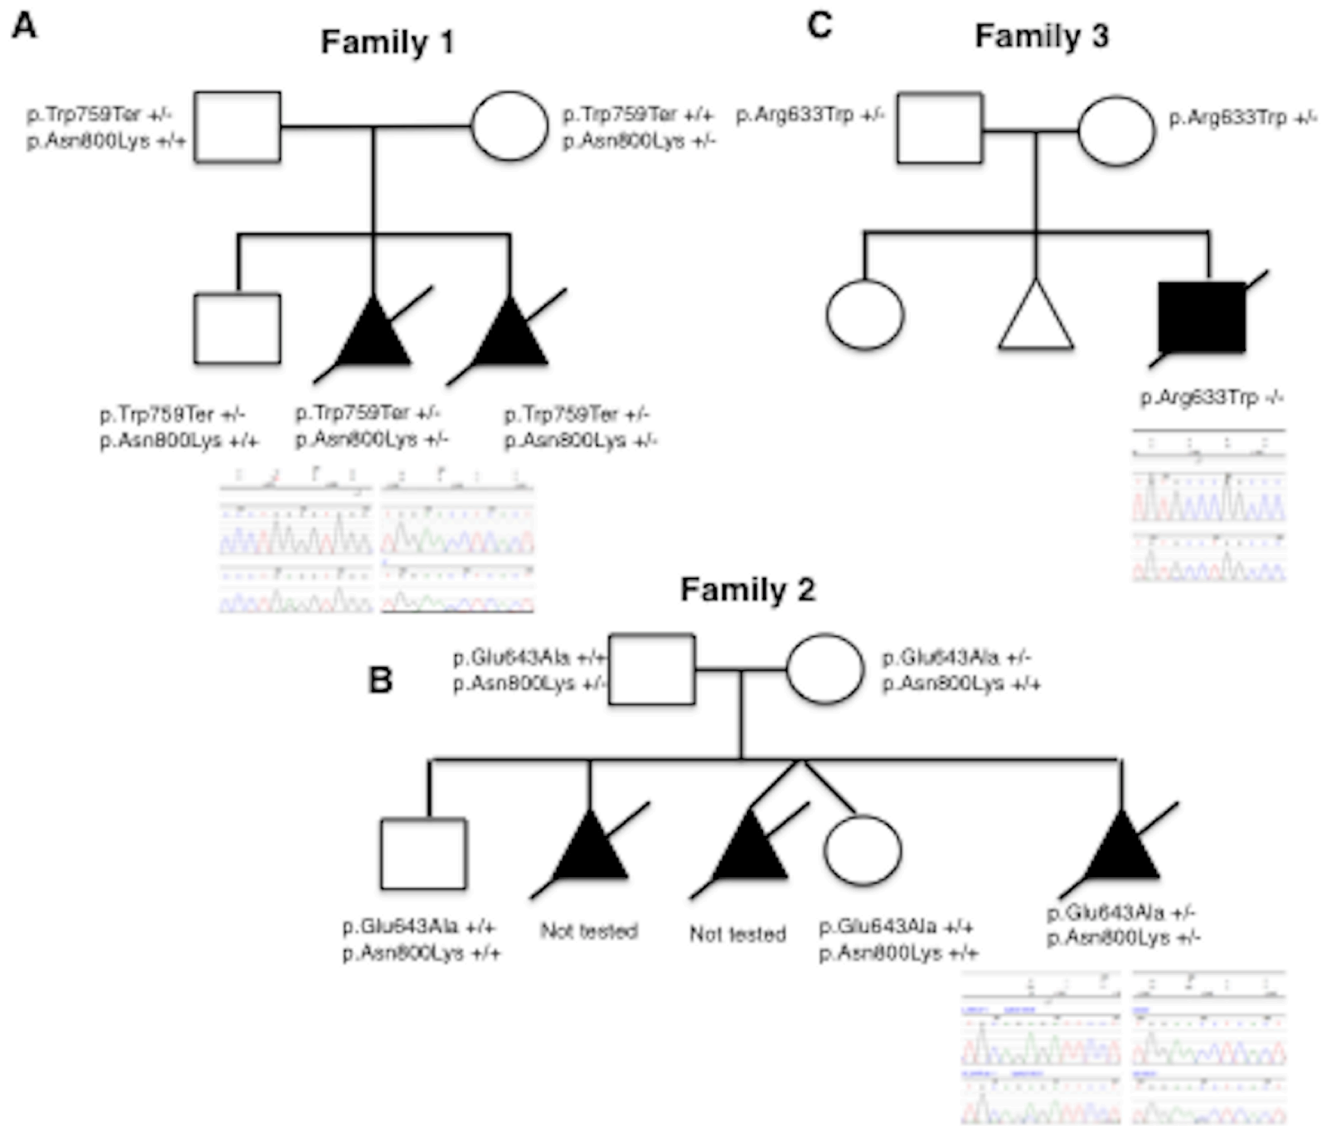

## Figure Legend for Supplemental Figure 1.

### Figure S1. Pedigree and Chromatograms for Families 1-3 with Mutations in *CRB2*.

Figure S1A. Pedigree for Family 1, showing c.2277G>A, predicting p.(Trp759Ter) in *CRB2* that was paternally inherited, and c.2400C>G, predicting p.(Asn800Lys) in *CRB2* that was maternally inherited in both affected children. The unaffected son is a carrier of p.(Trp759Ter) in *CRB2*.

Figure S1B. Pedigree for Family 2, showing c.2400C>G, predicting p.(Asn800Lys) in *CRB2* that was paternally inherited and c.1928A>C, predicting p.(Glu643Ala) in *CRB2* that was maternally inherited. Two healthy children tested negative for both mutations.

Figure S1C. Pedigree for Family 3, showing homozygosity for c.1897C>T, predicting p.(Arg633Trp) in *CRB2*. Both parents were carriers of the same mutation.

**Table S1. Clinical Features Associated with Cerebral Ventriculomegaly and Congenital Nephrosis in Published Patients**

|                                                                                                                   | Jolly et al.,<br>2003 <sup>37</sup><br>(Fam. A Sib 1) | Jolly et al.,<br>2003 <sup>37</sup><br>(Fam. A Sib 2) | Jolly et al.,<br>2003 <sup>37</sup><br>(Fam. A Sib 3) | Jolly et al.,<br>2003 <sup>37</sup><br>(Fam. B Sib 1) |
|-------------------------------------------------------------------------------------------------------------------|-------------------------------------------------------|-------------------------------------------------------|-------------------------------------------------------|-------------------------------------------------------|
| Age at Diagnosis                                                                                                  | 20w <sup>e</sup> gestation                            | 14w gestation                                         | 12w gestation                                         | 15w gestation                                         |
| <u>Central Nervous System</u><br>Ventriculomegaly<br>Grey matter heterotopias                                     | +, 'mild'                                             | +, 'mild'                                             |                                                       | +                                                     |
| <u>Cardiac</u><br>Ventricular septal defect<br>Pericardial effusion                                               | +                                                     |                                                       |                                                       | +                                                     |
| <u>Renal</u><br>Hydronephrosis<br>Microcysts<br>Hyperechogenicity                                                 | +                                                     | +                                                     |                                                       | +                                                     |
| Outcome                                                                                                           | TOP <sup>f</sup>                                      | TOP                                                   | TOP                                                   | TOP                                                   |
| <u>Amniotic Fluid Testing</u><br>MSAFP <sup>a</sup><br>AFAFP <sup>b</sup><br>AF Acetylcholinesterase <sup>c</sup> | 27/29 MoM <sup>g</sup>                                | 17/19 MoM<br>13 MoM                                   | 8 MoM                                                 | 21 MoM                                                |
| <u>Investigations</u><br>Karyotype<br>Array CGH <sup>d</sup><br><i>NPHS1</i> Sequencing                           |                                                       | 46,XX<br><br>Negative                                 |                                                       | 46,XX                                                 |

MSAFP<sup>a</sup> = Maternal serum alpha-fetoprotein; AFAFP<sup>b</sup> = Amniotic fluid alpha-fetoprotein; AF Acetylcholinesterase<sup>c</sup> = Amniotic fluid acetylcholinesterase; Array CGH<sup>d</sup> = array comparative genomic hybridization; w<sup>e</sup> = weeks; TOP<sup>f</sup> = Termination of Pregnancy; MoM<sup>g</sup> = Multiple of Median.
